Neseliler et al. Neural and behavioral endophenotypes of obesity

1 **Neural and behavioral endophenotypes of obesity.**

2 Selin Neseliler<sup>1</sup>, Uku Vainik<sup>1,2</sup>, Mahsa Dadar<sup>1</sup>, Yvonne H.C. Yau<sup>1</sup>, Isabel Garcia-Garcia<sup>1</sup>,

3 Stephanie G. Scala<sup>1</sup>, Yashar Zeighami<sup>1</sup>, D. Louis Collins<sup>1</sup> and Alain Dagher<sup>1</sup>

4

5 <sup>1.</sup> Montreal Neurological Institute, McGill University, Montréal, Canada

6 <sup>2.</sup> Institute of Psychology, University of Tartu, Estonia

7

8

9 *Word count of abstract: 249*

10 *Word count of main text: 3860*

11 *Figures and Tables: 4 Figures, 1 Table*

12 *Supplemental data: 3 Figures, 3 Tables*

13

14

15

16

17

18

19

20

21 Short/running title: Endophenotypes of obesity

22 Keywords: Obesity, MRI, impulsivity, weight gain, uncontrolled eating

23 **Abstract**

24 *Background*

25 Impulsivity is a risk factor for obesity. It has different underlying facets that can be assessed  
26 using questionnaires. Impulsivity can be further refined by the use of food-specific  
27 questionnaires, which measure a tendency to uncontrolled eating. We examined how these  
28 impulsivity measures relate to each other, to obesity, and to brain anatomy.

29 *Methods*

30 We assessed students in their first year of university - a risky period for weight gain- at the  
31 beginning (N = 2214) and at the end of the school year (N = 1145) using questionnaire measures  
32 of impulsivity, personality, stress reactivity and eating-specific traits. A subset of participants (N  
33 = 72) underwent T1-weighted MRI to investigate the brain correlates of impulsivity.

34 *Results*

35 Using factor analysis, we show that impulsivity can be stratified into three domains, which we  
36 label stress reactivity, reward sensitivity and self-control, while eating questionnaires resolve  
37 into a single latent factor - uncontrolled eating. A watershed model shows that uncontrolled  
38 eating mediates the effect of impulsivity traits on BMI. Self-control and stress reactivity scores  
39 are associated with a thinner lateral orbitofrontal cortex. In addition, stress reactivity correlates  
40 positively with amygdala and negatively with hippocampal volume. Longitudinally, lack of self-  
41 control, not uncontrolled eating, correlates with weight gain, while stress reactivity correlates  
42 with weight loss in male students.

43 *Conclusions*

44 The brain-impulsivity-obesity relationship is hierarchical. Structural brain differences relate to  
45 differences in impulsivity domains which affect BMI via uncontrolled eating. However,

Neseliler et al. Neural and behavioral endophenotypes of obesity

46 longitudinally, low self-control, not uncontrolled eating, is a predictor of weight gain in this  
47 sample.

48

49

50

51

52

53

54

55

56

57

58

59

60

61

62

63

64

65

## 66 **Introduction**

67 Obesity is a neurobehavioral disorder that stems from a vulnerable brain in a disease-promoting  
68 environment (1). Its risk factors can be studied as endophenotypes - intermediate phenotypes that  
69 link biological processes to observable outcomes (2, 3). Broadly, the neurobehavioral  
70 endophenotypes associated with obesity can be categorized as domain-general and eating-  
71 specific (4). The main domain-general endophenotype identified to date is impulsivity, defined  
72 as a tendency to act without full consideration of the consequences. Impulsivity is a multifaceted  
73 trait that has been associated with pathological gambling, substance abuse, and obesity (5, 6).  
74 Meta-analysis of impulsivity questionnaires revealed that impulsivity can further be subdivided  
75 into three domains that align with personality factors (5): 1) low *conscientiousness*, reflecting  
76 self-control ; 2) *neuroticism*, a reflection of an individual's sensitivity to stress and aversive  
77 events, and 3) *extraversion*, reflecting an individual's sensitivity to rewards (7–9). The  
78 magnitude and directionality of the association between impulsivity and obesity have been  
79 inconsistent (4, 10, 11). This inconsistency could be explained by different impulsivity measures  
80 and domains used across studies (4, 5, 11), and to weak effect sizes relating general impulsivity  
81 to BMI (12). Therefore, eating specific impulsivity questionnaires may better capture the  
82 vulnerability endophenotype.

83  
84 Eating-specific impulsivity constructs include emotional eating (13), disinhibited eating (14) and  
85 power of food (15). Scores on all these questionnaires consistently and strongly correlate with  
86 BMI (4, 16) and with each other (17). Different eating behavior questionnaires may be depicting  
87 a common underlying latent factor for eating specific impulsivity (16, 18). This can be labelled  
88 uncontrolled eating (UE). While both general impulsivity traits and UE have been linked to

89 increased BMI, the relationships between different impulsivity domains, UE and obesity remain  
90 to be tested (i.e. some impulsivity traits might be associated with eating-specific impulsive  
91 behavior which in turn will be linked to BMI (11, 12, 19)). Statistically, if true, this hypothesis  
92 implies a complete mediation of general impulsivity traits on BMI via eating-specific  
93 impulsivity. However, so far, comprehensive models have not been built for all impulsivity  
94 domains and eating questionnaires, and have not been applied to the prediction of weight gain.

95

96 There is considerable overlap between the brain regions associated with obesity and the brain  
97 regions associated with impulsivity (10, 20, 21). Scores from both general impulsivity and  
98 conscientiousness scales are inversely correlated with the thickness of the lateral prefrontal  
99 cortex (PFC) (8, 22–25) - a region that has been related to cognitive control. Neuroticism is  
100 positively correlated with amygdala volume and negatively correlated with hippocampal volume  
101 and prefrontal cortex thickness (26–29). Extraversion and sensation seeking correlate positively  
102 with medial orbitofrontal cortex (mOFC) and ventromedial PFC (vmPFC) volume (8, 30, 31), a  
103 region associated with the computation of value (32). These results support a model where the  
104 impulsivity endophenotype might be mapped to the brain as reduced cortical thickness in the  
105 prefrontal cortex and increased gray matter volume in brain structures (e.g. amygdala, OFC,  
106 mPFC) associated with reward and value computation (33). Such a brain endophenotype has also  
107 been associated with obesity (4, 10, 21). Differences in brain morphometry and function might  
108 underlie differences in impulsivity and might thereby be associated with obesity.

109

110 If impulsivity (either general or eating-specific) is a risk factor for obesity, people with these risk  
111 endophenotypes will have higher BMI and will gain more weight compared to their peers with

112 non-risk endophenotypes. So far, most analyses have been conducted on cross-sectional datasets  
113 making it difficult to say if impulsivity is a risk factor or a consequence of obesity (4). The  
114 freshman year of university creates an ideal time period to test these hypotheses both cross-  
115 sectionally and longitudinally. During this time, students transition into a new environment with  
116 access to similar food and exercise options, allowing underlying vulnerability to express itself.  
117 Weight gain often happens in this short period of time and affects approximately 50-60% of  
118 students (34–40). Of the risk factors for weight gain, eating specific behaviors that revolve  
119 around the concept of impulsivity have been most commonly studied, but the results have been  
120 contradictory (38, 41–44).

121

122 We used structural brain imaging measures, general and eating-specific impulsivity  
123 questionnaires, and measures of BMI and weight gain in freshman students to test the hypothesis  
124 that the relationship between brain, impulsivity and obesity is hierarchical. We utilized a  
125 hierarchical statistical framework referred to as a 'watershed model' to study the relationship  
126 between impulsivity endophenotypes. This methodological framework has previously proven  
127 useful to study the relationships between age, brain structure and intelligence (2, 45, 46). From  
128 this perspective, brain structure will influence impulsivity measures which could affect eating-  
129 specific impulsivity (namely, UE) that is associated with over-eating. We predicted that UE  
130 would mediate the relationship between general impulsivity and BMI domains, and act as a risk  
131 factor for weight gain during the freshman year of university.

132

133

134

135 **Methods and Materials**

136 **Participants**

137 Participants were first year McGill university students, at least 18 years of age, recruited via an  
138 advertisement sent to the incoming class electronic mailing list. Participants provided their  
139 consent online and data were collected using the online survey tool LimeSurvey  
140 (<https://www.limesurvey.org>) over three consecutive years. The study was approved by the  
141 Montreal Neurological Institute Research Ethics Board. Participants for the brain imaging  
142 experiment gave additional consent before participating.

143

144 **Questionnaires**

145 Participants filled out the following online questionnaires: "Big Five" personality dimensions  
146 (Openness/ Imagination, Conscientiousness, Agreeableness, Extraversion, and Neuroticism)  
147 from the International Personality Item Pool (IPIP) (47), two subscales (lack of perseverance and  
148 sensation seeking) of the UPPS Impulsive Behavior Scale (48), Cohen's Perceived Stress Scale  
149 (PSS) (49), and Rosenberg Self Esteem Scale (50) as well as eating specific questionnaires such  
150 as the disinhibition subscale of Three-Factor Eating Questionnaire (TFEQ)(14), emotional eating  
151 subscale of Dutch Eating Behavior Questionnaires (DEBQ) (13), and all subscales of Power of  
152 Food Scale (PFS) (15) (Table 1). A subset (N=1145) of our initial population completed a  
153 follow-up questionnaire in the spring for longitudinal assessment. Our questionnaire included  
154 two "catch" questions and three "catch-match" questions as a measure of the level of participants'  
155 attention in completing the survey. Participants with total catch scores above three were  
156 excluded. An additional exclusion criterion was BMI under 15 or above 45, resulting in a  
157 sample of 2213 participants (Males N= 752; Females N= 1461). Only after completion of the

158 questionnaire, participants were asked to visit our laboratory to have their BMI measured in both  
159 the fall and spring. BMI was measured from 333 participants in the fall, and from 209  
160 participants in the spring semester (N =115 overlap with the fall group) using a medical scale and  
161 a stadiometer. Reported BMI was highly correlated with measured BMI in the fall ( $r = 0.91$ ,  
162  $p < 10^{-5}$ ) and in the spring ( $r = 0.92$ ,  $p < 10^{-5}$ ). We replaced the reported BMI with measured BMI  
163 in the analyses for higher accuracy. BMI was further residualized for age, sex and a covariate to  
164 account for whether it was reported or measured. Brain imaging was conducted on a subset of  
165 participants (N=72) selected from this sample in the fall.

166

#### 167 Magnetic Resonance Imaging parameters and preprocessing

168 High-resolution T1-weighted anatomical images with voxel size = 1x1x1 mm were obtained (TR  
169 = 2.3 s; TE = 2.98 ms; FOV phase=93.8°; FOV = 256mm) with a Siemens Magnetom Trio 3T  
170 MRI scanner at the Montreal Neurological Institute (MNI).

171

172 Pre-processing of T1-weighted MRIs included denoising using optimized non-local means  
173 filtering (51), correction for intensity inhomogeneity (52) and linear intensity scaling using  
174 histogram matching to the ICBM-MNI152 template. The images were linearly registered to  
175 ICBM-MNI152 template (9 parameter registration) (53). A mask of the brain was generated  
176 using BEaST, a nonlocal segmentation method applied to the linearly registered images in  
177 stereotaxic space (54).

178

#### 179 Deformation Based Morphometry



180 Deformation Based Morphometry is utilized to calculate the local difference in tissue volume  
181 between subjects (55). Each MRI was non-linearly transformed to the stereotaxic ICBM-  
182 MNI152 template. The local deformation, a measure of tissue expansion or shrinkage, was then  
183 computed at each voxel. We utilized Deformation Based Morphometry as it is suggested to be  
184 the most sensitive morphometric method for studying subcortical anatomy (as explained in  
185 (56)).

186

### 187 Cortical Thickness

188 All T1-weighted MRI images were processed using the CIVET pipeline (version 2.1;  
189 <http://www.bic.mni.mcgill.ca/ServicesSoftware/CIVET>). Native T1-weighted MRI scans were  
190 first corrected using the N3 algorithm, underwent brain masking, and registration to ICBM-  
191 MNI152 template. Images were then segmented into gray matter (GM), white matter (WM),  
192 cerebrospinal fluid (CSF) and background using a neural net classifier. The white matter (inner)  
193 and gray matter (outer) cortical surfaces were extracted using the Constrained Laplacian-based  
194 Automated Segmentation with Proximities algorithm (CLASP). The resulting surfaces were  
195 resampled to a stereotaxic surface template to provide vertex-based measures of cortical  
196 thickness. All resulting images went through a stringent quality control by two inspectors in  
197 which 69 of 72 images were accepted for further analysis. Cortical thickness was then measured  
198 in MNI space using the linked distance between the two surfaces across vertices and a 20mm  
199 surface smoothing kernel was applied to the data. The Desikan–Killiany–Tourville (DKT) atlas  
200 was used to parcellate the surface into 64 cortical regions (57). Cortical thickness was averaged  
201 over all vertices (left and right) in each region of interest (ROI) for each subject. The subject  
202 mean cortical thickness was regressed out from the ROIs before further analysis.

203

204 Factor Analysis

205 Factor analysis was carried out in order to (i) understand the shared variance of the measured  
206 variables, which can be attributed to latent factor(s) and (ii) reduce the collinearity between the  
207 questionnaire scores. The correlation matrix of the impulsivity traits is shown in Figure S2.  
208 Questionnaire scores were z-scored for this group and entered into the factor analysis.  
209 Exploratory Factor Analysis was carried out first in order to identify the underlying factor  
210 structure of our set of observed variables. All of the statistical analyses are carried out in R  
211 version 3.3 (58). To account for missing values, we used the R “Amelia” library to impute data  
212 (59). We conducted our exploratory factor analysis on the split half of our population of 2213  
213 participants (N=1107) to create our model. Factor selection was conducted using parallel  
214 analysis via the `fa.parallel` function from the Psych package in R (60). The generated pattern  
215 matrix of standardized loadings suggested the existence of a 3-factor latent structure (Table S1).

216

217 Afterwards, confirmatory factor analysis (CFA) was utilized to test the relationship between our  
218 observed variables and their underlying latent factors in both split-halves of the sample (61). All  
219 structural equation models were fit using package Lavaan 0.5 (62). BMI was log transformed to  
220 increase normality. Models were fit using full information maximum likelihood (FIML) using  
221 robust standard errors. Model fit was assessed with the chi-square test ( $X^2$ ), the Comparative Fit  
222 index (CFI), Root Mean Square Error of Approximation (RMSEA) and the standardized root  
223 mean squared residuals (SRMR). The following guidelines were utilized for judging good fit:  
224  $CFI > 0.95$ ;  $RMSEA < 0.08$  and  $SRMR < 0.10$  (63). The hierarchical relationship between  
225 impulsivity, UE and BMI was tested using the watershed framework (see supplementary

226 material, also explained in (46)). Only variables that survived multiple comparisons with False  
227 Discovery Rate (FDR) are displayed as significant. The  $p$  values reported are FDR corrected.

228

## 229 **Results**

### 230 **Eating-specific impulsivity factor uncontrolled eating is correlated with BMI**

231 Participant characteristics are listed in Table 1. We first tested if UE emerged as a latent factor  
232 that captures the covariance between the eating questionnaires, namely Disinhibition (TFEQ),  
233 Power of Food, and Emotional Eating (DEBQ) (Figure 1-A). We created the model in the first  
234 split-half sample, and verified it in the second split-half. Both models resulted in good fits and  
235 returned similar loadings (Table S2). Following the best practices in structural equation  
236 modeling (64), here we report our model in the full sample. A single factor confirmatory factor  
237 analysis for UE provided a good fit for our data. Figure 1-B shows that UE correlated with BMI  
238 ( $\beta = 0.37, p < 10^{-5}$ ) and explained 9.2% of the variance in BMI ( $F(1, 2206) = 223.7, p < 10^{-5}$ ).

239

### 240 **General impulsivity traits can be explained with a three-factor latent structure and are** 241 **correlated with BMI**

242 We next tested the relationship between general impulsivity measures and UE and BMI. A data  
243 driven exploratory factor analysis in a split-half of the data suggested a three-factor latent factor  
244 structure for impulsivity traits (Table S1). The first factor had a negative loading from the  
245 Rosenberg self-esteem questionnaire and positive loadings from Neuroticism (IPIP) and the  
246 Perceived Stress Scale (PSS). We labelled this factor ‘Stress Reactivity (STRESS)’. The second  
247 factor had a positive loading from Lack of Perseverance (UPPS) and a negative loading from  
248 Conscientiousness (IPIP). We labelled this latent factor ‘Lack of Self Control’. The third factor

249 was named ‘Reward Sensitivity’ (REWARD) and it was characterized by positive loadings from  
250 the Extraversion (IPIP) and Sensation Seeking (UPPS) subscales (Table 1). We next tested if  
251 these general impulsivity domains were associated with BMI. Using confirmatory factor  
252 analysis, we showed that there is a small but significant correlation between STRESS and BMI  
253 ( $\beta = 0.08$ ,  $p=0.028$ ), and REWARD and BMI ( $\beta=0.09$ ,  $p = 0.028$ ) (Figure 1-C).

254

### 255 **The relationship between general impulsivity, uncontrolled eating, and BMI**

256 General impulsivity traits might exert their effects on BMI via UE, eating-specific  
257 impulsivity. To test this, we fit the full watershed model integrating the general impulsivity  
258 latent factors, the UE latent factor and BMI (Figure 1-D). Our model satisfied the predictions of  
259 the watershed model (46, see supplementary materials). These results showed that the  
260 relationship between general impulsivity, UE and BMI is hierarchical. Furthermore, our  
261 watershed model was selective for eating behaviors. For example, when alcohol intake (i.e. how  
262 many alcoholic beverages do you consume a week?) was utilized as the outcome variable in the  
263 watershed model, general impulsivity factors, but not UE, explained 25.6% of the variance in  
264 alcohol intake (Figure S3).

265

### 266 **UE mediates the relationship of stress reactivity and reward sensitivity to BMI**

267 We additionally utilized mediation analysis to test if UE mediates the relationships between  
268 STRESS and BMI and REWARD and BMI. Using the structural equation model framework, we  
269 simultaneously modelled two pathways: UE mediates (i) the effect of REWARD on BMI and (ii)  
270 the effect of STRESS on BMI. The analysis confirmed that the effects of STRESS and  
271 REWARD on BMI were mediated by UE (76% mediation; Figure 2; Table S3).

272

### 273 **Prefrontal and subcortical brain structures are associated with impulsivity traits**

274 We hypothesized that structural brain measures might be related to the latent impulsivity factors.  
275 To test this hypothesis, we included brain regions that have been linked to impulsivity traits and  
276 obesity in the full model. Cortical regions were measured using cortical thickness (CT) and  
277 anatomical differences in subcortical regions were measured using deformation-based  
278 morphometry. We found that STRESS was positively associated with amygdala volume ( $\beta =$   
279  $0.29$ ,  $p = 0.035$ ) and inversely with hippocampal volume ( $\beta = -0.33$ ,  $p = 0.021$ ) and lateral OFC  
280 thickness ( $\beta = -0.31$ ,  $p = 0.035$ ). Lack of self-control inversely correlated with lateral OFC  
281 cortical thickness ( $\beta = -0.33$ ,  $p = 0.041$ ). Independent of these relationships, superior frontal  
282 gyrus thickness inversely correlated with BMI ( $\beta = -0.38$ ,  $p = 0.014$ ).

283

### 284 **Longitudinal Predictors of Weight Gain**

285 We next looked for predictors of change in body weight in the first year of university (Figure 4-  
286 A). Our results revealed that students gained on average  $0.51$  kg ( $SD \pm = 3.22$ ) in the first year of  
287 university (August/September to April/May), which is a small but significant effect ( $t = 5.4$ ,  $df =$   
288  $1133$ ,  $p\text{-value} = p < 10^{-5}$ ,  $95\% \text{ CI} = 0.32\text{-}0.68$ ). We utilized percent BMI change as the outcome  
289 variable to account for the initial BMI. Our model explained  $1.5\%$  of the variance in percent  
290 BMI change (Figure 4-A). According to our model, UE did not significantly predict BMI  
291 change in this sample ( $\beta = 0.03$ ,  $p = 0.57$ ). Among the impulsivity factors, Lack of Self Control  
292 predicted weight change ( $\beta = 0.10$ ,  $p = 0.028$ ), while stress reactivity predicted weight loss ( $\beta = -$   
293  $0.13$ ,  $p = 0.028$ ). A post-hoc regression analysis of the relationship between stress reactivity and  
294 weight change revealed that this negative correlation was driven by males. In male students,

295 STRESS explained 2% of the variance in weight reduction ( $\beta = -0.17$ ,  $p = 0.0053$ ,  $N = 360$ ,  $R^2 =$   
296  $0.02$ ). No significant correlation emerged for female students ( $\beta = -0.061$ ,  $p = 0.15$ ,  $N = 788$ ,  $R^2$   
297  $= 0.001$ ) (Figure 4-B).

298

## 299 **Discussion**

300 The purpose of the current study was twofold (i) to provide a comprehensive link between brain  
301 structure, impulsivity and obesity, and (ii) to characterize the temporal relationship between  
302 impulsivity and weight changes. We utilized a large sample size ( $N > 2000$ ) of first-year students  
303 and accounted for the multidimensional nature of impulsivity to study these relationships. The  
304 models were developed in the first split-half of the sample and replicated in the second.

305

306 We first stratified impulsivity into two domains: general and eating-specific, and then tested the  
307 relationship between these two domains. We showed that the variance of different eating-specific  
308 questionnaires can be captured by a general underlying latent factor (UE). UE had a strong  
309 relationship to BMI. This result was consistent with previous studies suggesting that different  
310 food questionnaires are measuring different severity levels of a common latent factor: eating-  
311 specific impulsivity (16, 18). Next, we demonstrated that the commonly used general impulsivity  
312 questionnaires can be explained in a three-factor structure that align with the general personality  
313 domains of neuroticism (stress sensitivity), conscientiousness (self-control), and extraversion  
314 (reward sensitivity) (Figure 1-C). This result is in agreement with the previously published meta-  
315 analysis of impulsivity factor structure (5), and highlights the multifaceted nature of impulsivity.

316

317 We hypothesized that people with general impulsivity traits might also exhibit eating-specific  
318 impulsivity, and that the relationship between general personality domains, UE and BMI would  
319 be hierarchical. Using the hierarchical watershed model, we first showed that each general  
320 impulsivity domain had an independent and positive correlation with UE (Figure 1-D). While  
321 stress reactivity and reward sensitivity weakly correlated with BMI, we showed that this was  
322 mediated by UE (Figure 2). This mediation was specific for BMI. For example, increased scores  
323 in each general impulsivity domain, but not UE, were linked to increased alcohol intake (Figure  
324 S3). This suggests eating-specific impulsivity (UE) captures the relationship between impulsivity  
325 and obesity.

326

327 Differences in brain structure might underlie differences in impulsivity domains (20). We next  
328 tested if brain morphometry related to impulsivity or if it had an independent correlation with  
329 BMI. Our results showed that cortical thickness in lateral OFC is inversely related to the self-  
330 control and stress reactivity latent factor scores (Figure 3). This is in line of the role of lateral  
331 OFC in maintaining goal-oriented focus by suppressing irrelevant information (65–67).  
332 Furthermore, lateral OFC and its neighboring ventrolateral PFC have also been implicated in  
333 emotional regulation, particularly in the reduction of negative affect (66, 68, 69). Lateral OFC  
334 thickness has been shown to be lower in adults with obesity (70). Our results add to this literature  
335 and suggest that reduced lateral OFC thickness might affect impulsivity and thereby appetite  
336 control and obesity.

337

338 Both amygdala and hippocampus have been implicated in the control of food intake as well as in  
339 stress reactivity (71–74). In this study we showed that a personality dimension related to stress

340 reactivity was associated with greater amygdala volume and lower hippocampal volume,  
341 consistent with previous reports (26, 27, 75). Our results suggest that differences in amygdala  
342 and hippocampal volumes might relate to increased stress reactivity which can lead to UE and  
343 obesity. Independent of these relationships, we showed that superior frontal gyrus thickness was  
344 inversely related to BMI consistent with the literature (70, 76, 77). This suggests that some brain  
345 regions might be important in overeating and obesity independent of impulsivity.

346

347 Finally, we tested the hypothesis UE underlies vulnerability for weight gain. We utilized the  
348 transition period into university that is associated with high risk of weight gain to study this  
349 hypothesis. In our sample, the average weight gain was small, but significant, and was similar to  
350 previously reported studies (40). However, in this sample we failed to find that UE was a  
351 predictor of weight gain. This could be due to limited duration of the study. Furthermore, the  
352 directionality of the UE-BMI relationship could contribute to this result: changes in body weight  
353 might lead to longitudinal variations in eating-specific impulsivity. For instance, scores in  
354 different uncontrolled eating scales decrease after bariatric surgery (78–81) or voluntary weight  
355 loss (82, 83). In this study, weight changes correlated with changes in disinhibition score from  
356 TFEQ (has the highest loading UE) between spring and fall semesters ( $\beta = 0.088$ ,  $p = 0.02$ ,  $N =$   
357 660), supporting this view.

358

359 Our results support a model in which weight gain results from lack of self-control. Upon  
360 transitioning into a new environment, difficulties in self-control could compromise the  
361 maintenance of behaviors that promote healthy weight. High scores on conscientiousness have  
362 been consistently linked to a lower risk of having and developing obesity across independent



363 samples (84, 85). These results are generally derived from sample populations with a higher  
364 mean age than ours, suggesting that self-control deficits may be more associated with BMI as  
365 individuals age and start making their own food decision. Our findings thus point to self-control  
366 deficits as risk factors for future weight gain in young populations.

367

368 Higher stress reactivity correlated with longitudinal weight loss in our study. This result is  
369 surprising, and yet, it is consistent with the existence of bidirectional effects of stress on eating  
370 behaviors. Stress is associated both with weight-gain and weight-loss longitudinally (86, 87).  
371 This bidirectional relationship might be partly mediated by sex differences, since there seem to  
372 be biological and psychological variations in stress responses among sexes (88). Male  
373 participants that report distress at the transition from high school to university tend to lose weight  
374 (89) and decrease their food intake compared to female participants (90). In a similar vein, our  
375 post hoc analysis revealed that stress reactivity was associated with weight loss only in male  
376 students. Conversely, the stress reactive endophenotype was associated with higher BMI,  
377 possibly due to differences in the effects of chronic versus acute stress on appetite and weight  
378 gain (91).

379

380 The results of our study should be considered with regards to its limitations. Although we had a  
381 large sample group, whereby we were able to detect and replicate results from meta-analyses,  
382 most of our measures were self-reported. In addition, brain imaging was conducted with a  
383 smaller subset from the sample. Therefore, the relationship between impulsivity and brain  
384 morphometry were only tested in regions of interest based on the literature. This limits the  
385 generalizability of the brain imaging results.

386  
387  
388  
389  
390  
391  
392  
393  
394  
395  
396  
397  
398  
399  
400  
401  
402  
403  
404  
405  
406  
407  
408  
409  
410

**Conclusions**

The present study provides a comprehensive characterization of the relationships between different facets of impulsivity and obesity. We show that structural brain differences relate to differences in impulsivity domains which affect BMI via eating-specific impulsivity (UE). However, predictors of weight gain, at least in the short-term, are different than the risk factors associated with increased BMI. Deficits in self-control, not UE, predict longitudinal weight gain, while higher stress reactivity predicts weight loss in the first year of university (in males). These findings highlight the role of self-control deficits in longitudinal weight gain. Our results might inform future clinical strategies aimed at fostering self-control abilities to prevent and/or treat unhealthy weight gain.

411  
412  
413  
414  
415  
416  
417  
418  
419  
420  
421  
422  
423  
424  
425  
426  
427  
428  
429  
430  
431  
432  
433  
434

### **Acknowledgments**

This research was supported by a Canadian Institutes of Health Research Grant to AD. SN was supported by a Frederick Banting and Charles Best Canada Graduate Scholarship. UV is supported by Personal Post-doctoral Research Funding project PUTJD654 and by Fonds de recherche du Québec – Santé (FRQS) foreign post-doctoral training award.

### **Disclosures**

SN, UV, MD, YY, IGG, SGS, YZ, DLC, AD reported no financial interests or potential conflicts of interest.

435 **References**

- 436 1. O’Rahilly S, Farooqi IS (2008): Human obesity: a heritable neurobehavioral disorder that is  
437 highly sensitive to environmental conditions. *Diabetes*. 57: 2905–10.
- 438 2. Cannon TD, Keller MC (2006): Endophenotypes in the Genetic Analyses of Mental Disorders.  
439 *Annu Rev Clin Psychol*. 2: 267–290.
- 440 3. Dagher A, Neseliler S, Han JE (2017): Appetite as motivated choice: Hormonal and  
441 environmental influences. *Decis Neurosci An Integr Perspect*. pp 397–409.
- 442 4. Vainik U, Dagher A, Dubé L, Fellows LK (2013): Neurobehavioural correlates of body mass  
443 index and eating behaviours in adults: a systematic review. *Neurosci Biobehav Rev*. 37:  
444 279–99.
- 445 5. Sharma L, Markon KE, Clark LA (2014): Toward a theory of distinct types of “impulsive”  
446 behaviors: A meta-analysis of self-report and behavioral measures. *Psychol Bull*. 140: 374–  
447 408.
- 448 6. Dalley JW, Robbins TW (2017): Fractionating impulsivity: neuropsychiatric implications. *Nat*  
449 *Rev Neurosci*. 18.
- 450 7. Costa PT, McCrae RR (1992): Professional manual: revised NEO personality inventory  
451 (NEO-PI-R) and NEO five-factor inventory (NEO-FFI). *Odessa FL Psychol Assess Resour*.
- 452 8. DeYoung CG, Hirsh JB, Shane MS, Papademetris X, Rajeevan N, Gray JR (2010): Testing  
453 predictions from personality neuroscience. Brain structure and the big five. *Psychol Sci a J*  
454 *Am Psychol Soc / APS*. 21: 820–828.
- 455 9. Gray JA (1987): The Psychology of Fear and Stress. *Probl Behav Sci*. New York, NY:  
456 Cambridge University Press., p 422.
- 457 10. Michaud A, Vainik U, Garcia-Garcia I, Dagher A (2017): Overlapping Neural

- 458 Endophenotypes in Addiction and Obesity. *Front Endocrinol (Lausanne)*. 8: 127.
- 459 11. Emery RL, Levine MD (2017): Questionnaire and behavioral task measures of impulsivity  
460 are differentially associated with body mass index: A comprehensive meta-analysis.  
461 *Psychol Bull.* 143: 868–902.
- 462 12. Meule A (2017): Commentary: Questionnaire and behavioral task measures of impulsivity  
463 are differentially associated with body mass index: a comprehensive meta-analysis. *Front*  
464 *Psychol.* 8: 1222.
- 465 13. van Strien T, Frijters JER, Bergers GPA, Defares PB (1986): The Dutch Eating Behavior  
466 Questionnaire (DEBQ) for assessment of restrained, emotional, and external eating  
467 behavior. *Int J Eat Disord.* 5: 295–315.
- 468 14. Stunkard AJ, Messick S (1985): The three-factor eating questionnaire to measure dietary  
469 restraint, disinhibition and hunger. *J Psychosom Res.* 29: 71–83.
- 470 15. Lowe MR, Butryn ML, Didie ER, Annunziato RA, Thomas JG, Crerand CE, *et al.* (2009):  
471 The Power of Food Scale. A new measure of the psychological influence of the food  
472 environment. *Appetite.* 53: 114–118.
- 473 16. Price M, Higgs S, Lee M (2015): Self-reported eating traits: Underlying components of food  
474 responsivity and dietary restriction are positively related to BMI. *Appetite.* 95: 203–10.
- 475 17. Mason AE, Vainik U, Acree M, Tomiyama AJ, Dagher A, Epel ES, Hecht FM (2017):  
476 Improving Assessment of the Spectrum of Reward-Related Eating: The RED-13. *Front*  
477 *Psychol.* 8: 795.
- 478 18. Vainik U, Neseliler S, Konstabel K, Fellows LK, Dagher A (2015): Eating traits  
479 questionnaires as a continuum of a single concept. Uncontrolled eating. *Appetite.* 90: 229–  
480 239.

- 481 19. Meule A, Blechert J (2017): Indirect effects of trait impulsivity on body mass. *Eat Behav.* 26:  
482 66–69.
- 483 20. Allen TA, DeYoung CG (2016): *Personality Neuroscience and the Five Factor Model.* (Vol.  
484 1).
- 485 21. Willette AA, Kapogiannis D (2015): Does the brain shrink as the waist expands? *Ageing Res*  
486 *Rev.* 20: 86–97.
- 487 22. Matsuo K, Nicoletti M, Nemoto K, Hatch JP, Peluso MAM, Nery FG, Soares JC (2009): A  
488 Voxel-Based Morphometry Study of Frontal Gray Matter Correlates of Impulsivity. *Hum*  
489 *Brain Mapp.* 30: 1188–1195.
- 490 23. Schilling C, Kühn S, Romanowski A, Schubert F, Kathmann N, Gallinat J (2012): Cortical  
491 thickness correlates with impulsiveness in healthy adults. *Neuroimage.* 59: 824–830.
- 492 24. Korponay C, Pujara M, Deming P, Philippi C, Decety J, Kosson DS, *et al.* (2017): Impulsive-  
493 antisocial psychopathic traits linked to increased volume and functional connectivity within  
494 prefrontal cortex. *Soc Cogn Affect Neurosci.* 12: 1169–1178.
- 495 25. Schilling C, Kühn S, Paus T, Romanowski A, Banaschewski T, Barbot A, *et al.* (2013):  
496 Cortical thickness of superior frontal cortex predicts impulsiveness and perceptual  
497 reasoning in adolescence. *Mol Psychiatry.* 18: 624–630.
- 498 26. Pruessner M, Bechara-Evans L, Pira S, Joober R, Collins DL, Pruessner JC, Malla AK  
499 (2017): Interplay of hippocampal volume and hypothalamus-pituitary-adrenal axis function  
500 as markers of stress vulnerability in men at ultra-high risk for psychosis. *Psychol Med.* 47:  
501 471–483.
- 502 27. Holmes AJ, Lee PH, Hollinshead MO, Bakst L, Roffman JL, Smoller JW, Buckner RL  
503 (2012): Individual differences in amygdala-medial prefrontal anatomy link negative affect,

- 504           impaired social functioning, and polygenic depression risk. *J Neurosci*. 32: 18087–100.
- 505   28. Kapogiannis D, Sutin A, Davatzikos C, Costa P, Resnick S, Resnick S (2013): The five
- 506           factors of personality and regional cortical variability in the Baltimore longitudinal study of
- 507           aging. *Hum Brain Mapp*. 34: 2829–40.
- 508   29. Bjørnebekk A, Fjell AM, Walhovd KB, Grydeland H, Torgersen S, Westlye LT (2013):
- 509           Neuronal correlates of the five factor model (FFM) of human personality: Multimodal
- 510           imaging in a large healthy sample. *Neuroimage*. 65: 194–208.
- 511   30. Cremers HR, Demenescu LR, Aleman A, Renken R, van Tol M-J, van der Wee NJA, *et al.*
- 512           (2010): Neuroticism modulates amygdala-prefrontal connectivity in response to negative
- 513           emotional facial expressions. *Neuroimage*. 49: 963–70.
- 514   31. Omura K, Todd Constable R, Canli T (2005): Amygdala gray matter concentration is
- 515           associated with extraversion and neuroticism. *Neuroreport*. 16: 1905–8.
- 516   32. Bartra O, McGuire JT, Kable JW (2013): The valuation system: a coordinate-based meta-
- 517           analysis of BOLD fMRI experiments examining neural correlates of subjective value.
- 518           *Neuroimage*. 76: 412–27.
- 519   33. Hawes SW, Chahal R, Hallquist MN, Paulsen DJ, Geier CF, Luna B (2017): Modulation of
- 520           reward-related neural activation on sensation seeking across development. *Neuroimage*.
- 521           147: 763–771.
- 522   34. Mokdad AH, Serdula MK, Dietz WH, Bowman BA, Marks JS, Koplan JP (1999): The
- 523           spread of the obesity epidemic in the United States, 1991-1998. *JAMA*. 282: 1519–1522.
- 524   35. Nelson MC, Story M, Larson NI, Neumark-Sztainer D, Lytle LA (2008): Emerging
- 525           adulthood and college-aged youth: an overlooked age for weight-related behavior change.
- 526           *Obesity (Silver Spring)*. 16: 2205–2211.

- 527 36. Levitsky DA, Youn T (2004): The More Food Young Adults Are Served, the More They  
528 Overeat. *J Nutr.* 134: 2546–2549.
- 529 37. Lloyd-Richardson EE, Bailey S, Fava JL, Wing R, Tobacco Etiology Research Network  
530 (TERN) (2009): A prospective study of weight gain during the college freshman and  
531 sophomore years. *Prev Med (Baltim).* 48: 256–261.
- 532 38. Pliner P, Saunders T (2008): Vulnerability to freshman weight gain as a function of dietary  
533 restraint and residence. *Physiol Behav.* 93: 76–82.
- 534 39. Provencher V, Polivy J, Wintre MG, Pratt MW, Pancer SM, Birnie-Lefcovitch S, Adams GR  
535 (2009): Who gains or who loses weight? Psychosocial factors among first-year university  
536 students. *Physiol Behav.* 96: 135–141.
- 537 40. Vadeboncoeur C, Townsend N, Foster C (2015): A meta-analysis of weight gain in first year  
538 university students: is freshman 15 a myth? *BMC Obes.* 2: 22.
- 539 41. Lowe MR, Annunziato RA, Markowitz JT, Didie E, Bellace DL, Riddell L, *et al.* (2006):  
540 Multiple types of dieting prospectively predict weight gain during the freshman year of  
541 college. *Appetite.* 47: 83–90.
- 542 42. Vella-Zarb RA, Elgar FJ (2009): The ‘Freshman 5’: A Meta-Analysis of Weight Gain in the  
543 Freshman Year of College. *J Am Coll Heal.* 58: 161–166.
- 544 43. Finlayson G, Cecil J, Higgs S, Hill A, Hetherington M (2012): Susceptibility to weight gain.  
545 Eating behaviour traits and physical activity as predictors of weight gain during the first  
546 year of university. *Appetite.* 58: 1091–1098.
- 547 44. Meule A, Platte P (2018): An Examination of the “Freshman-15” in Germany. *Eur J Heal*  
548 *Psychol.* 25: 2–8.
- 549 45. Kievit RA, Davis SW, Mitchell DJ, Taylor JR, Duncan J, Tyler LK, *et al.* (2014): Distinct



- 550 aspects of frontal lobe structure mediate age-related differences in fluid intelligence and  
551 multitasking. *Nat Commun.* 5: 5658.
- 552 46. Kievit RA, Davis SW, Griffiths J, Correia MM, Cam-Can, Henson RN (2016): A watershed  
553 model of individual differences in fluid intelligence. *Neuropsychologia.* 91: 186–198.
- 554 47. Donnellan MB, Oswald FL, Baird BM, Lucas RE (2006): The Mini-IPIP Scales: Tiny-yet-  
555 effective measures of the Big Five Factors of Personality. *Psychol Assess.* 18: 192–203.
- 556 48. Whiteside SP, Lynam DR (2001): The Five Factor Model and impulsivity: using a structural  
557 model of personality to understand impulsivity. *Pers Individ Dif.* 30: 669–689.
- 558 49. Cohen S, Kamarck T, Mermelstein R (1983): A global measure of perceived stress. *J Health*  
559 *Soc Behav.* 24: 385–396.
- 560 50. Rosenberg M (1965): *Society and the adolescent self-image.* .
- 561 51. Coupe P, Yger P, Prima S, Hellier P, Kervrann C, Barillot C (2008): An Optimized  
562 Blockwise Nonlocal Means Denoising Filter for 3-D Magnetic Resonance Images. *IEEE*  
563 *Trans Med Imaging.* 27: 425–441.
- 564 52. Sled JG, Zijdenbos AP, Evans AC (1998): A nonparametric method for automatic correction  
565 of intensity nonuniformity in MRI data. *IEEE Trans Med Imaging.* 17: 87–97.
- 566 53. Collins DL, Neelin P, Peters TM, Evans AC (1994): Automatic 3D intersubject registration  
567 of MR volumetric data in standardized Talairach space. *J Comput Assist Tomogr.* 18: 192–  
568 205.
- 569 54. Eskildsen SF, Coupé P, Fonov V, Manjón J V., Leung KK, Guizard N, *et al.* (2012): BEaST:  
570 Brain extraction based on nonlocal segmentation technique. *Neuroimage.* 59: 2362–2373.
- 571 55. Borghammer P, Østergaard K, Cumming P, Gjedde A, Rodell A, Hall N, Chakravarty MM  
572 (2010): A deformation-based morphometry study of patients with early-stage Parkinson’s

- 573 disease. *Eur J Neurol.* 17: 314–320.
- 574 56. Zeighami Y, Ulla M, Iturria-Medina Y, Dadar M, Zhang Y, Larcher KM-H, *et al.* (2015):  
575 Network structure of brain atrophy in de novo Parkinson’s disease. *Elife.* 4: 1472–1475.
- 576 57. Desikan RS, Ségonne F, Fischl B, Quinn BT, Dickerson BC, Blacker D, *et al.* (2006): An  
577 automated labeling system for subdividing the human cerebral cortex on MRI scans into  
578 gyral based regions of interest. . doi: 10.1016/j.neuroimage.2006.01.021.
- 579 58. Team R (2013): R Development Core Team. *R A Lang Environ Stat Comput.* .
- 580 59. James Honaker A, King G, Blackwell M, Matthew Blackwell M (2018): A Program for  
581 Missing Data. . Retrieved from <https://cran.r-project.org/web/packages/Amelia/Amelia.pdf>.
- 582 60. Revelle W (2016): How To: Use the psych package for Factor Analysis and data reduction. .
- 583 61. Suhr DD (2006): Exploratory or Confirmatory Factor Analysis? *SAS Users Gr Int Conf.* (pp.  
584 1-17).
- 585 62. Rosseel Y (2012): **lavaan** : An R Package for Structural Equation Modeling. *J Stat Softw.* 48:  
586 1–36.
- 587 63. Kenny DA, Kaniskan B, McCoach DB (2015): The Performance of RMSEA in Models With  
588 Small Degrees of Freedom. *Sociol Methods Res.* 44: 486–507.
- 589 64. Schreiber JB, Nora A, Stage FK, Barlow EA, King J (2006): Reporting Structural Equation  
590 Modeling and Confirmatory Factor Analysis Results: A Review. *J Educ Res.* 99: 323–338.
- 591 65. Vuilleumier P, Armony JL, Driver J, Dolan RJ (2001): Effects of attention and emotion on  
592 face processing in the human brain: an event-related fMRI study. *Neuron.* 30: 829–41.
- 593 66. Hooker CI, Knight RT (2006): Role of the Orbitofrontal Cortex in the Inhibition of Emotion.  
594 *The Orbitofrontal Cortex.* 307–324.
- 595 67. Hong S-B, Kim J-W, Choi E-J, Kim H-H, Suh J-E, Kim C-D, *et al.* (2013): Reduced

- 596 orbitofrontal cortical thickness in male adolescents with internet addiction. *Behav Brain*  
597 *Funct.* 9: 11.
- 598 68. Phan KL, Fitzgerald DA, Nathan PJ, Moore GJ, Uhde TW, Tancer ME (2005): Neural  
599 substrates for voluntary suppression of negative affect: A functional magnetic resonance  
600 imaging study. *Biol Psychiatry.* 57: 210–219.
- 601 69. Wager TD, Davidson ML, Hughes BL, Lindquist MA, Ochsner KN (2008): Prefrontal-  
602 Subcortical Pathways Mediating Successful Emotion Regulation. *Neuron.* 59: 1037–1050.
- 603 70. Ottino-González J, Jurado MA, García-García I, Segura B, Marqués-Iturria I, Sender-  
604 Palacios MJ, *et al.* (2017): Allostatic Load Is Linked to Cortical Thickness Changes  
605 Depending on Body-Weight Status. *Front Hum Neurosci.* 11: 639.
- 606 71. Kanoski SE, Grill HJ (2017): Hippocampus Contributions to Food Intake Control:  
607 Mnemonic, Neuroanatomical, and Endocrine Mechanisms. *Biol Psychiatry.* 81: 748–756.
- 608 72. Neseliler S, Han J, Dagher A (2017): The Use of Functional Magnetic Resonance Imaging in  
609 the Study of Appetite and Obesity. *Appet Food Intake.* (Vol. 2), pp 117–134.
- 610 73. Stevenson RJ, Francis HM (2017): The hippocampus and the regulation of human food  
611 intake. *Psychol Bull.* 143: 1011–1032.
- 612 74. Arnsten AFT (2015): Stress weakens prefrontal networks: molecular insults to higher  
613 cognition. *Nat Neurosci.* 18: 1376–1385.
- 614 75. McEwen BS, Bowles NP, Gray JD, Hill MN, Hunter RG, Karatsoreos IN, Nasca C (2015):  
615 Mechanisms of stress in the brain. *Nat Neurosci.* 18: 1353–1363.
- 616 76. Marqués-Iturria I, Pueyo R, Garolera M, Segura B, Junqué C, García-García I, *et al.* (2013):  
617 Frontal cortical thinning and subcortical volume reductions in early adulthood obesity.  
618 *Psychiatry Res Neuroimaging.* 214: 109–115.

- 619 77. Lavagnino L, Mwangi B, Bauer IE, Cao B, Selvaraj S, Prossin A, Soares JC (2016): Reduced  
620 Inhibitory Control Mediates the Relationship Between Cortical Thickness in the Right  
621 Superior Frontal Gyrus and Body Mass Index. *Neuropsychopharmacology*. 41: 2275–2282.
- 622 78. Ivezaj V, Wiedemann AA, Grilo CM (2017): Food addiction and bariatric surgery: a  
623 systematic review of the literature. *Obes Rev*. 18: 1386–1397.
- 624 79. Koball AM, Clark MM, Collazo-Clavell M, Kellogg T, Ames G, Ebbert J, Grothe KB  
625 (2016): The relationship among food addiction, negative mood, and eating-disordered  
626 behaviors in patients seeking to have bariatric surgery. *Surg Obes Relat Dis*. 12: 165–170.
- 627 80. Sevinçer GM, Konuk N, Bozkurt S, Coşkun H (2016): Food addiction and the outcome of  
628 bariatric surgery at 1-year: Prospective observational study. *Psychiatry Res*. 244: 159–164.
- 629 81. Holsen LM, Davidson P, Cerit H, Hye T, Moondra P, Haimovici F, *et al.* (2017): Neural  
630 predictors of 12-month weight loss outcomes following bariatric surgery. *Int J Obes*. 1–9.
- 631 82. Martin CK, O’Neil PM, Pawlow L (2006): Changes in Food Cravings during Low-Calorie  
632 and Very-Low-Calorie Diets\*. *Obesity*. 14: 115–121.
- 633 83. Batra P, Das SK, Salinardi T, Robinson L, Saltzman E, Scott T, *et al.* (2013): Relationship of  
634 cravings with weight loss and hunger. Results from a 6month worksite weight loss  
635 intervention. *Appetite*. 69: 1–7.
- 636 84. Jokela M, Hintsanen M, Hakulinen C, Batty GD, Nabi H, Singh-Manoux A, Kivimäki M  
637 (2013): Association of personality with the development and persistence of obesity: a meta-  
638 analysis based on individual-participant data. *Obes Rev*. 14: 315–23.
- 639 85. Sutin AR, Terracciano A (2017): Personality and Body Weight: Mechanisms, Longitudinal  
640 Associations and Context. *Pasonariti kenkyu*. 26: 1–11.
- 641 86. Serlachius A, Hamer M, Wardle J (2007): Stress and weight change in university students in

- 642 the United Kingdom. *Physiol Behav.* 92: 548–553.
- 643 87. Kivimäki M, Head J, Ferrie JE, Shipley MJ, Brunner E, Vahtera J, Marmot MG (2006):
- 644 Work stress, weight gain and weight loss: evidence for bidirectional effects of job strain on
- 645 body mass index in the Whitehall II study. *Int J Obes.* 30: 982–987.
- 646 88. Verma R, Balhara YPS, Gupta CS (2011): Gender differences in stress response: Role of
- 647 developmental and biological determinants. *Ind Psychiatry J.* 20: 4–10.
- 648 89. Economos CD, Hildebrandt ML, Hyatt RR (2008): College freshman stress and weight
- 649 change: differences by gender. *Am J Health Behav.* 32: 16–25.
- 650 90. Zellner DA, Loaiza S, Gonzalez Z, Pita J, Morales J, Pecora D, Wolf A (2006): Food
- 651 selection changes under stress. *Physiol Behav.* 87: 789–793.
- 652 91. Sominsky L, Spencer SJ (2014): Eating behavior and stress: a pathway to obesity. *Front*
- 653 *Psychol.* 5: 434.
- 654
- 655
- 656
- 657
- 658
- 659
- 660
- 661
- 662
- 663
- 664

665 **Table 1. Descriptive statistics of the study variables.**

666 2214 Students (34% Males) filled the questionnaires in the fall semester. Out of the 2214  
667 students, 1145 answered the questionnaires in the spring. There were no significant  
668 differences in the variables of interest between participants who completed only fall and  
669 who completed both fall and spring questionnaires (Figure S1). Paired t-tests revealed that  
670 BMI in the spring (mean difference 0.15 kg/m<sup>2</sup>; t = 4.40, p-value = 1.5\*10<sup>-5</sup>, 95% CI: 0.08 -  
671 0.22) and weight in the spring (mean difference 0.51 kg; t = 5.32, p < 10<sup>-5</sup>, 95% CI: 0.32 -  
672 0.70) were significantly different from the fall values. 95% CI refer to 95 percent  
673 confidence intervals. UE: Uncontrolled Eating.

674

| Variables                                                     | Mean | SD (±) | min  | max  |
|---------------------------------------------------------------|------|--------|------|------|
| Age                                                           | 19.8 | 3.4    | 18.0 | 52.0 |
| BMI (kg/m <sup>2</sup> )                                      | 22.2 | 3.4    | 15.5 | 42.8 |
| Spring BMI (kg/m <sup>2</sup> )                               | 22.3 | 3.3    | 14.7 | 44.3 |
| Disinhibition (Three-Factor Eating Questionnaire (14))        | 6.4  | 3.4    | 0.0  | 16.0 |
| Emotional Eating (Dutch Eating Behavior Questionnaire (13))   | 2.5  | 0.7    | 1.0  | 4.8  |
| Power of Food (PFS) (15)                                      | 12.4 | 3.7    | 5.0  | 25.0 |
| Lack of Perseverance (the UPPS Impulsive Behavior Scale (48)) | 1.9  | 0.4    | 1.0  | 3.7  |
| Sensation Seeking (the UPPS Impulsive Behavior Scale (48))    | 2.8  | 0.6    | 1.0  | 4.0  |
| Rosenberg Self Esteem (50)                                    | 29.9 | 5.0    | 13.0 | 40.0 |
| Cohen's Perceived Stress Scale (49)                           | 24.5 | 7.2    | 2.0  | 52.0 |

Neseliler et al. Neural and behavioral endophenotypes of obesity

|                                                              |      |      |       |      |
|--------------------------------------------------------------|------|------|-------|------|
| Neuroticism (International Personality Item Pool (47))       | 11.6 | 2.9  | 4.0   | 20.0 |
| Agreeableness (International Personality Item Pool(47))      | 15.6 | 2.8  | 4.0   | 20.0 |
| Imagination (International Personality Item Pool(47))        | 15.2 | 2.7  | 4.0   | 20.0 |
| Conscientiousness (International Personality Item Pool (47)) | 14.0 | 2.9  | 4.0   | 20.0 |
| Extraversion (International Personality Item Pool(47))       | 12.1 | 3.5  | 4.0   | 20.0 |
| Change in weight in first year (kg)                          | 0.51 | 3.22 | -13.0 | 15.0 |

675

676

677

678

679

680

681

682

683

684

685

686

687

688

689

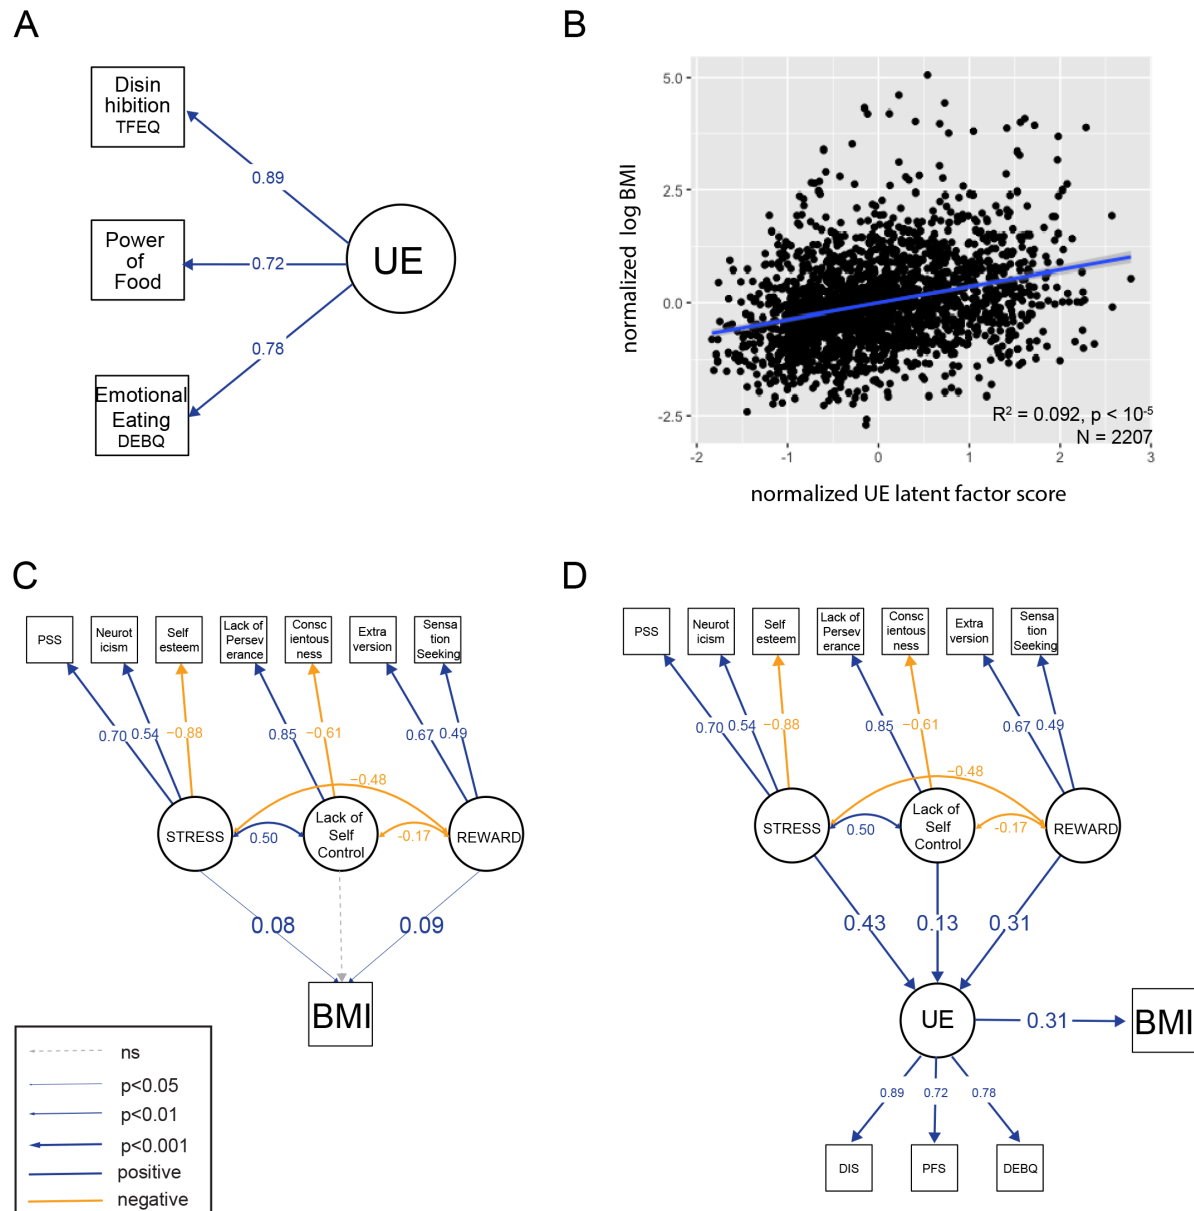

690  
 691 **Figure 1. Eating-specific impulsivity UE correlates with general impulsivity traits and with**  
 692 **BMI.** A) A single-factor confirmatory factor analysis for uncontrolled eating fits the data well  
 693 ( $X^2=30.28, df=4, p<.001, CFI=.992, RMSEA=.054, SRMR=.015$ ). B) Linear fit of UE with log  
 694 BMI. C) Confirmatory factor analysis analysis of impulsivity traits with three latent factors fit  
 695 the data well ( $X^2=147.277, df=14, p<.001, CFI=.963, RMSEA=.066, SRMR=.03$ ). After  
 696 multiple comparison correction, STRESS and REWARD are weakly correlated with BMI. D)  
 697 The full watershed model that links general impulsivity traits to UE and UE to BMI fits the data



698 well. ( $X^2=328.03$ ,  $df=34$ ,  $p<.001$ ,  $CFI=.957$ ,  $RMSEA=.063$ ,  $SRMR=.035$ ) REWARD: Reward  
699 Sensitivity; STRESS: Stress Reactivity; UE: Uncontrolled Eating. B-D represent normalized  
700 scores that have been residualized for age and sex. DEBQ: Emotional eating from DEBQ scale;  
701 DIS: Disinhibition from TFEQ; PFS: Power of Food Scale; PSS: Perceived Stress Scale; Self-  
702 esteem: Rosenberg Self Esteem Scale. Significant relationships after FDR correction for multiple  
703 comparisons are shown in blue or yellow based on the directionality of the relationship.

704

705

706

707

708

709

710

711

712

713

714

715

716

717

718

719

720

A

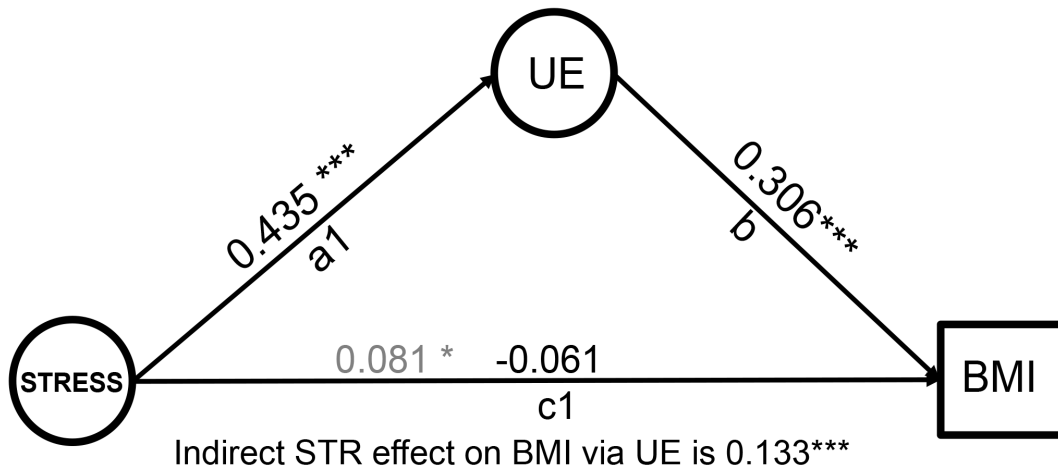

B

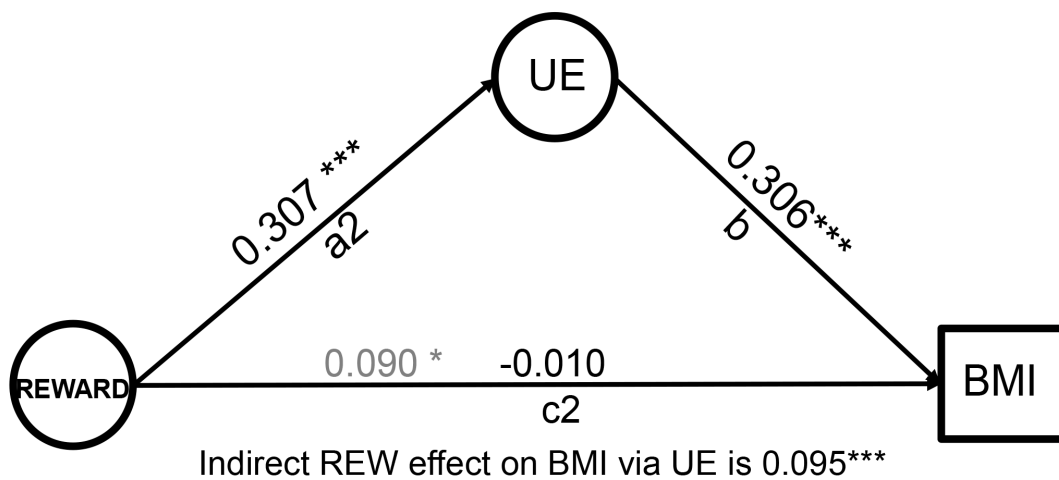

$$\text{Mediation Effect Size} = \frac{(a_1 \times b) + (a_2 \times b)}{c_1 + c_2 + (a_1 \times b) + (a_2 \times b)} \times 100 = 76 \%$$

721

722 **Figure 2. Mediation model for BMI.** The mediation model tests the hypothesis that the effect

723 of general personality traits- STRESS and REWARD- on BMI is mediated by UE. In mediation

724 models, there are three paths, a, b and c, between the variables. Full mediation will result in the

725 direct relationship between the independent variable and the dependent variable (path c) to

726 become insignificant when taking the mediator into account (path a). The mediation models were

Neseliler et al. Neural and behavioral endophenotypes of obesity

727 fit together in structural equation model framework but displayed on separate figures as A and B.  
728 REWARD: Reward Sensitivity; STRESS: Stress Reactivity; UE: Uncontrolled Eating. Gray  
729 numbers represent the regression coefficients between general impulsivity traits and BMI  
730 without UE as shown in Figure 1-C. \* $P < 0.05$ , \*\* $P < 0.01$ , \*\*\* $P < 0.001$ .

731

732

733

734

735

736

737

738

739

740

741

742

743

744

745

746

747

748

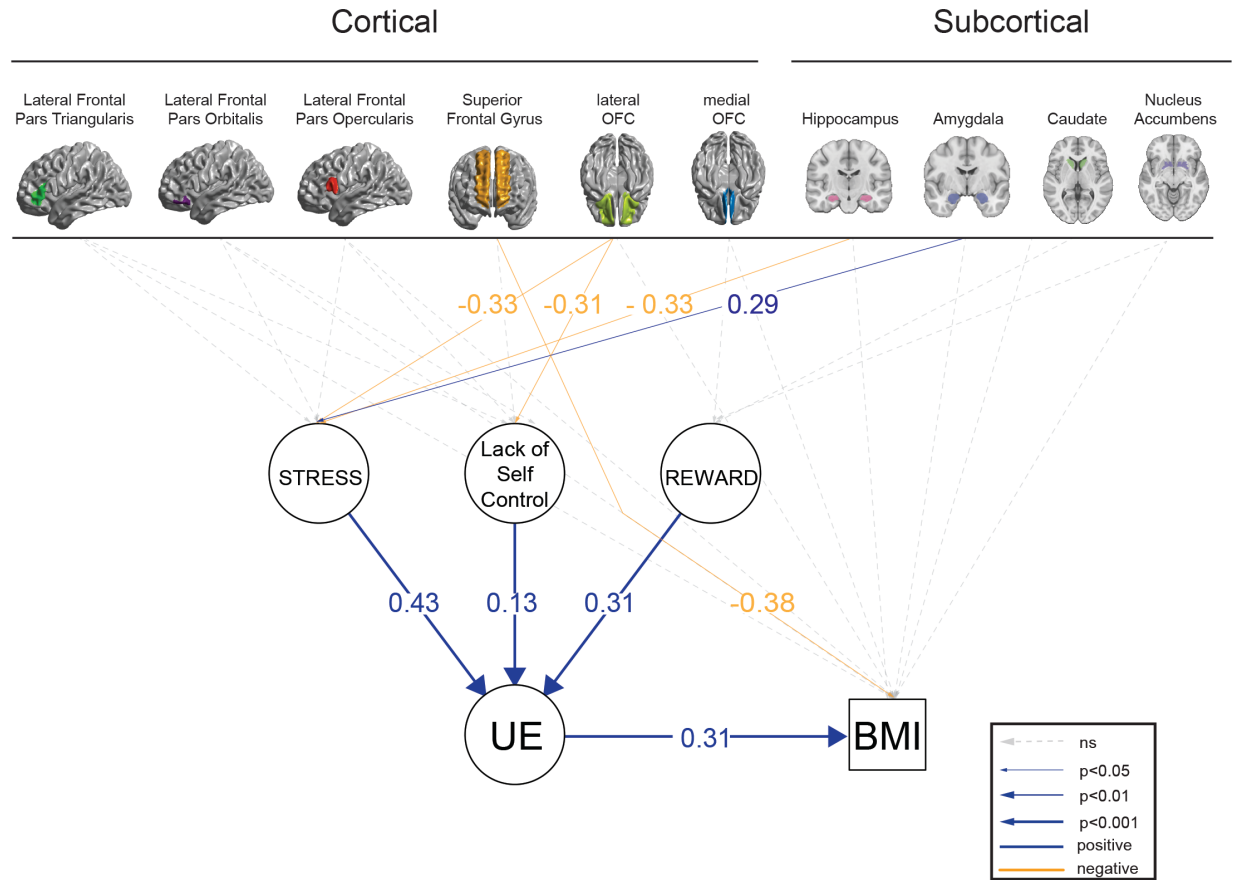

749

750 **Figure 3. The full watershed model with structural brain parameters.** This model fits the  
 751 data well ( $X^2=440.485$ ,  $df=120$ ,  $p<.001$ ,  $CFI=.954$ ,  $RMSEA=.035$ ,  $SRMR=.07$ ). All of the  
 752 numbers shown reflect parameters that are standardized and residualized for age and sex. The  
 753 correlations within the latent factors and within the brain parameters are allowed but not shown  
 754 for simplicity. Significant relationships after FDR correction for multiple comparisons are shown  
 755 in blue or yellow based on the directionality of the relationship. Dashed lines represent tested  
 756 nonsignificant regressions. REWARD: Reward Sensitivity; STRESS: Stress Reactivity; UE:  
 757 Uncontrolled Eating.

758

759

Neseliler et al. Neural and behavioral endophenotypes of obesity

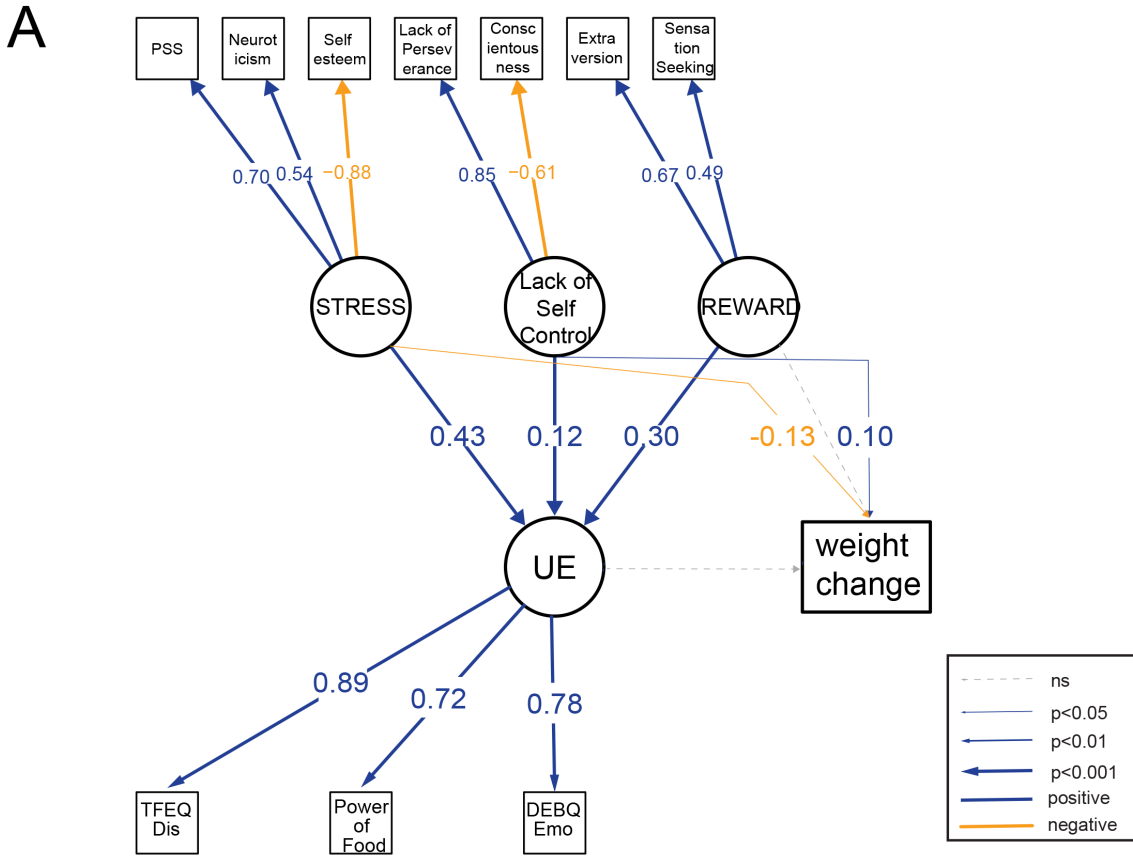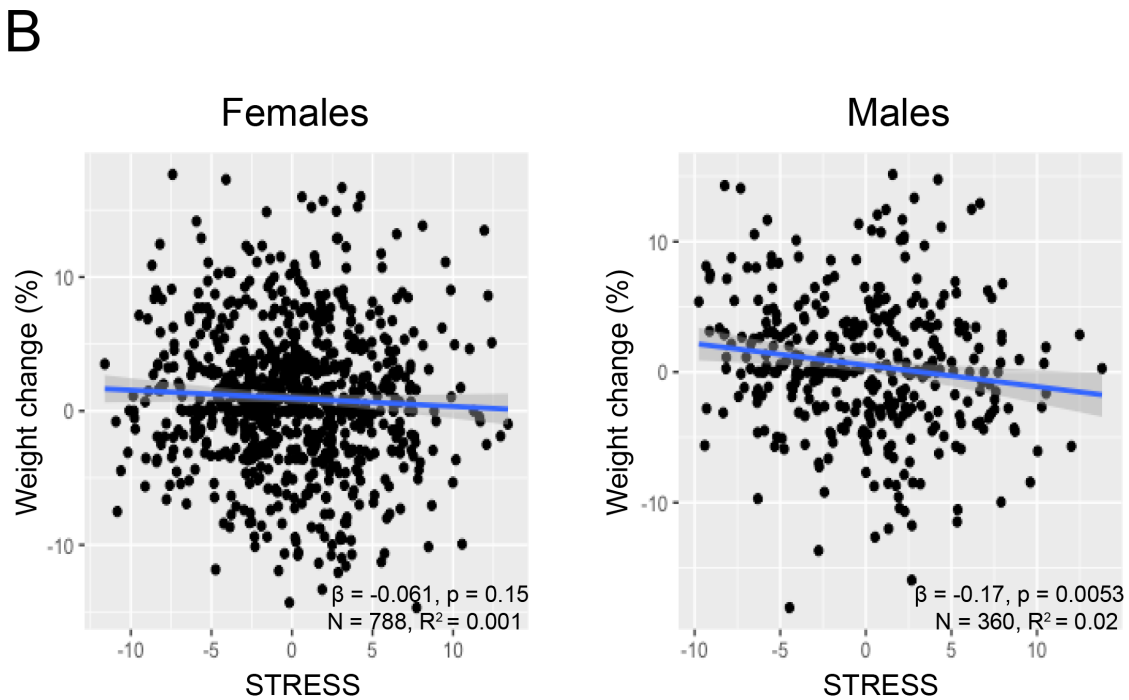

Neseliler et al. Neural and behavioral endophenotypes of obesity

761 **Figure 4. Predictors of weight gain in first year university students.** A) This model represents  
762 the whole watershed model with percent BMI change as the outcome variable in (N = 1134). The  
763 data fits this model well ( $X^2=124.855$ ,  $df=34$ ,  $p<.001$ ,  $CFI=.972$ ,  $RMSEA=.048$ ,  $SRMR=.03$ ).  
764 All of the numbers shown reflect parameters that are standardized and residualized for age and  
765 sex. Significant relationships after FDR correction for multiple comparisons are shown in blue or  
766 yellow based on the directionality of the relationship. B) Regression analysis of STRESS  
767 endophenotype with weight change is only significant in male students. Raw data is plotted in  
768 panel B. UE: Uncontrolled Eating; STRESS: Stress Reactivity; REWARD: Reward Sensitivity.  
769

Neseliler et al. Supplementary Information

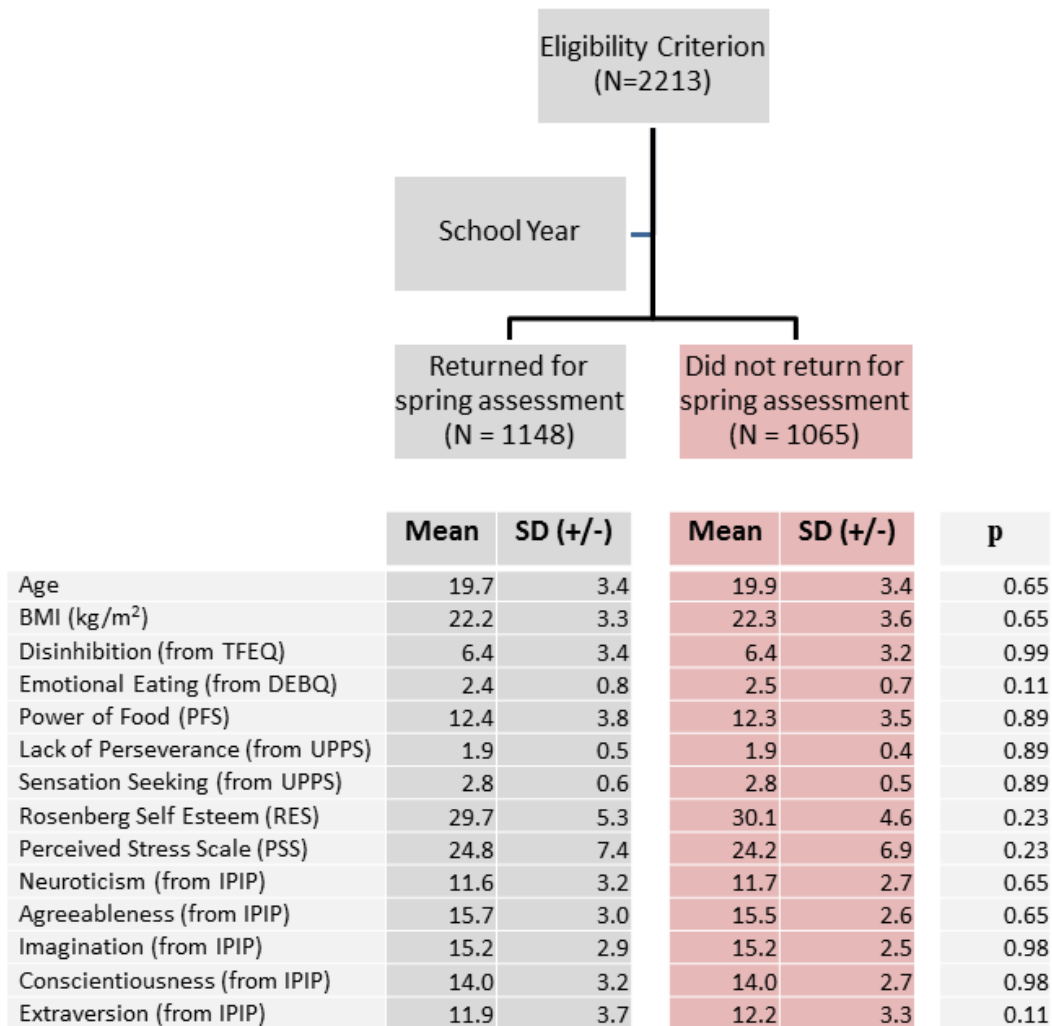

1

2

3 **Supplementary Figure 1. Descriptive statistics of participants who completed only the first**

4 **session in the fall and who completed both sessions.** There were no significant differences in

5 the variables of interest between participants between these groups after FDR correction.

6

7

Neseliler et al. Supplementary Information

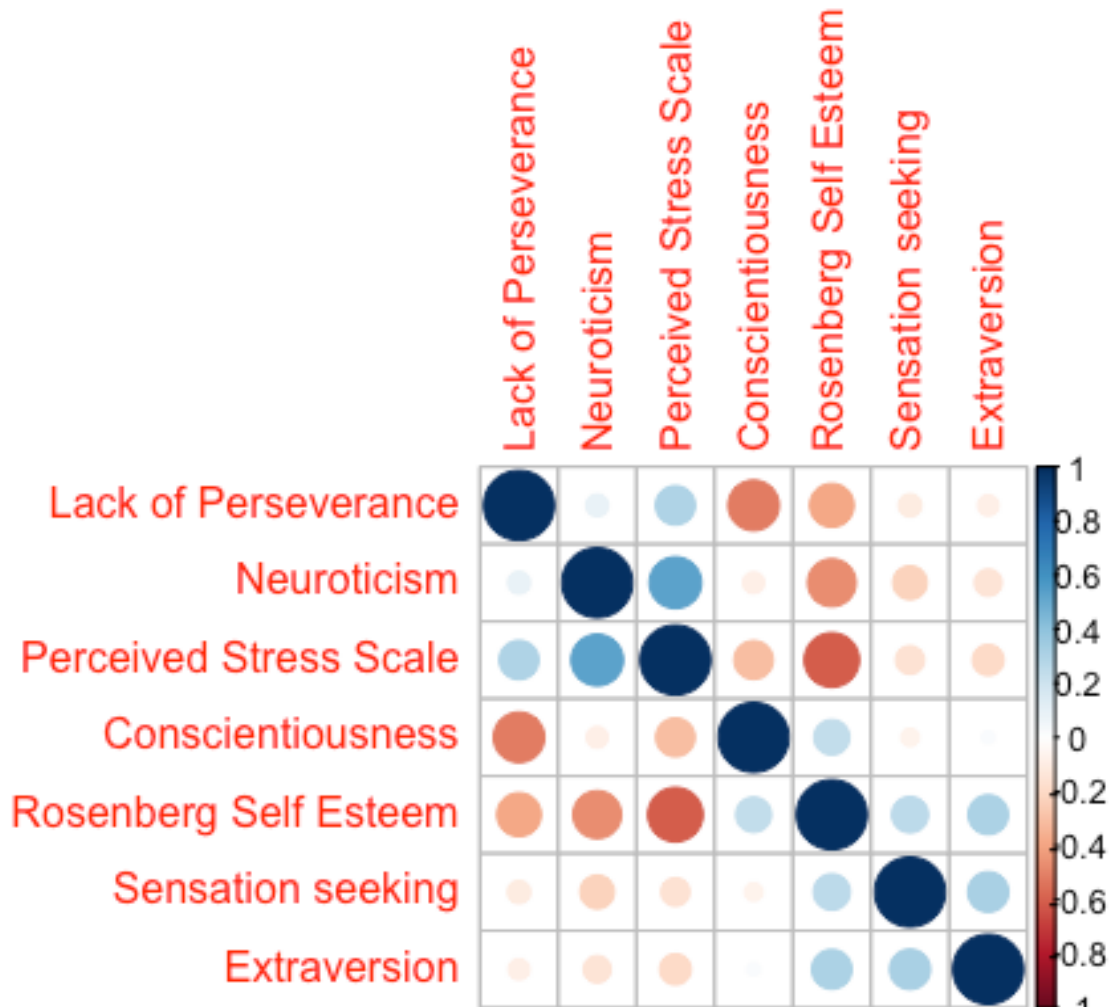

8

9 **Supplementary Figure 2.** Correlation plot of the impulsivity traits used in the exploratory factor

10 analysis. Blue colors refer to positive correlations, red refer to negative correlations. The size of

11 the circle is modulated by the correlation coefficient value. The correlation is shown only for the

12 split half of the data.

13

14



Neseliler et al. Supplementary Information

15

16

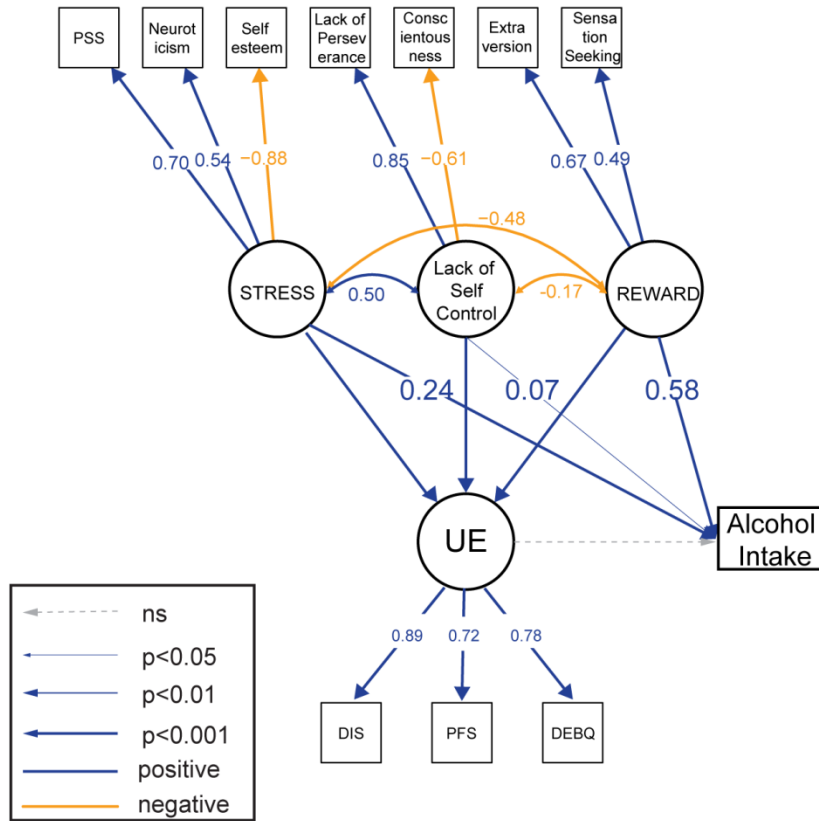

17

18

19 **Supplementary Figure 3. Uncontrolled eating does not correlate with alcohol intake.**

20 The full watershed model that links general impulsivity traits to UE and alcohol fits the data well

21 ( $X^2=242.058$ ,  $df=43$ ,  $p<.001$ ,  $CFI=.971$ ,  $RMSEA=.046$ ,  $SRMR=.032$ ). This model explains 25.6

22 % of the variance in reported alcoholic beverages consumption per week. All of the numbers sho

23 wn reflect parameters that are fully standardized and residualized for age and sex. Significant rel

24 ationships after FDR correction for multiple comparisons are shown in blue or yellow based on t

Neseliler et al. Supplementary Information

25 he directionality of the relationship. UE: Uncontrolled Eating; STRESS: Stress Reactivity; REW  
26 ARD: Reward Sensitivity.

27 **Supplementary Table 1. Results of the exploratory factor analysis.**

28 Parallel analysis is a technique that compares the scree plot of the observed data with that of a  
29 random data matrix of the same size as the original (Revelle). Sharp breaks in the scree plot,  
30 which plots successive eigenvalues, provide an estimation of the appropriate number of factors to  
31 extract. After analyzing the generated pattern matrix, we decided to exclude Imagination,  
32 Restraint, Agreeableness from our factor structure. These variables had poor communalities,  
33 meaning our factor structure explained a relatively low fraction of the variance for these  
34 variables. Re-running our parallel analysis suggested that the optimal number of factors = 3.

35 Parallel analysis suggests that the number of factors = 3

```
36 Factor Analysis using method = minres
37 Call: fa(r = r, nfactors = 3, n.obs = nrow(means))
38 Standardized loadings (pattern matrix) based upon correlation matrix
39
40           item  MR1  MR2  MR3  h2  u2 com
41 Perceived Stress Scale  7  0.85                0.73 0.27 1.0
42 Neuroticism             6  0.70                0.46 0.54 1.1
43 Rosenberg Self Esteem  3 -0.56                0.60 0.40 1.6
44 Lack of Perseverance   1          -0.84            0.70 0.30 1.0
45 Conscientiousness      5          0.60            0.43 0.57 1.3
46 Sensation seeking      2                0.62 0.39 0.61 1.0
47 Extraversion           4                0.50 0.27 0.73 1.0
```

Neseliler et al. Supplementary Information

48  
49  
50  
51  
52  
53  
54  
55  
56  
57  
58  
59  
60  
61  
62  
63  
64  
65  
66  
67  
68  
69  
70  
71

|                                                                       | MR1   | MR2   | MR3   |
|-----------------------------------------------------------------------|-------|-------|-------|
| SS loadings                                                           | 1.62  | 1.17  | 0.78  |
| Proportion Var                                                        | 0.23  | 0.17  | 0.11  |
| Cumulative Var                                                        | 0.23  | 0.40  | 0.51  |
| Proportion Explained                                                  | 0.45  | 0.33  | 0.22  |
| Cumulative Proportion                                                 | 0.45  | 0.78  | 1.00  |
| With factor correlations of                                           |       |       |       |
|                                                                       | MR1   | MR2   | MR3   |
| MR1                                                                   | 1.00  | -0.39 | -0.36 |
| MR2                                                                   | -0.39 | 1.00  | 0.11  |
| MR3                                                                   | -0.36 | 0.11  | 1.00  |
| Tucker Lewis Index of factoring reliability = 0.889                   |       |       |       |
| RMSEA index = 0.094 and the 90 % confidence intervals are 0.066 0.124 |       |       |       |
| BIC = 10.88                                                           |       |       |       |
| Fit based upon off diagonal values = 1                                |       |       |       |
| Measures of factor score adequacy                                     |       |       |       |

Neseliler et al. Supplementary Information

72 **Supplementary Table 2. Values from the CFA analysis of uncontrolled eating (UE) in the**  
73 **first and second split half of the sample.**

74

|            | <b>X<sup>2</sup></b> | <b>df</b> | <b>P value</b> | <b>CFI</b> | <b>RMSEA</b> | <b>SRMR</b> |
|------------|----------------------|-----------|----------------|------------|--------------|-------------|
| <b>UE1</b> | 11.83                | 4         | 0.019          | 0.995      | 0.042        | 0.014       |
| <b>UE2</b> | 19.32                | 4         | 0.001          | 0.990      | 0.059        | 0.017       |

75

76

77

78

79

80

81

82

83

84

85

86

87 **Supplementary Table 3. Mediation Analysis Results**

Neseliler et al. Supplementary Information

```
88 lavaan (0.5-23.1097) converged normally after 43 iterations
89
90
91
92
93
94
95
96
97
98
99
100 Parameter Estimates:
101
102
103
104
105 Latent Variables:
106
107
108
109
110
111
```

|                                 | Used    | Total |
|---------------------------------|---------|-------|
| Number of observations          | 2208    | 2213  |
| Number of missing patterns      | 2       |       |
| Estimator                       | ML      |       |
| Minimum Function Test Statistic | 328.032 |       |
| Degrees of freedom              | 34      |       |
| P-value (Chi-square)            | 0.000   |       |

  

|                 | Observed | Standard |
|-----------------|----------|----------|
| Information     | Observed |          |
| Standard Errors | Standard |          |

  

|                         | Estimate | Std.Err | z-value | P(> z ) | Std.lv | Std.all |
|-------------------------|----------|---------|---------|---------|--------|---------|
| STRESS =~               |          |         |         |         |        |         |
| PSS                     | 1.000    |         |         |         | 0.691  | 0.702   |
| Neuroticism             | 0.736    | 0.029   | 25.789  | 0.000   | 0.509  | 0.533   |
| Rosenberg               | -1.248   | 0.054   | -23.236 | 0.000   | -0.863 | -0.883  |
| Lack of Self Control =~ |          |         |         |         |        |         |

Neseliler et al. Supplementary Information

|     |                   |        |       |         |       |        |        |
|-----|-------------------|--------|-------|---------|-------|--------|--------|
| 112 | Lack of Persever  | 1.000  |       |         |       | 0.830  | 0.846  |
| 113 | Conscientiousness | -0.726 | 0.049 | -14.704 | 0.000 | -0.603 | -0.609 |
| 114 | REWARD =~         |        |       |         |       |        |        |
| 115 | Extraversion      | 1.000  |       |         |       | 0.675  | 0.677  |
| 116 | SensationSeeking  | 0.701  | 0.064 | 10.987  | 0.000 | 0.473  | 0.492  |
| 117 | UE =~             |        |       |         |       |        |        |
| 118 | Disinhibition     | 1.000  |       |         |       | 0.845  | 0.886  |
| 119 | PFST              | 0.820  | 0.024 | 33.882  | 0.000 | 0.693  | 0.721  |
| 120 | DEBQ              | 0.864  | 0.024 | 36.314  | 0.000 | 0.730  | 0.780  |

121

122 Regressions:

| 123 |          |      | Estimate | Std.Err | z-value | P(> z ) | Std.lv | Std.all |
|-----|----------|------|----------|---------|---------|---------|--------|---------|
| 124 | UE ~     |      |          |         |         |         |        |         |
| 125 | STRESS   | (a1) | 0.526    | 0.051   | 10.286  | 0.000   | 0.430  | 0.430   |
| 126 | LackofSC |      | 0.140    | 0.035   | 4.034   | 0.000   | 0.137  | 0.137   |
| 127 | REWARD   | (a2) | 0.385    | 0.058   | 6.627   | 0.000   | 0.308  | 0.308   |
| 128 | logBMI ~ |      |          |         |         |         |        |         |
| 129 | STRESS   | (c1) | -0.085   | 0.055   | -1.555  | 0.120   | -0.059 | -0.061  |
| 130 | LackofSC |      | -0.025   | 0.034   | -0.724  | 0.469   | -0.021 | -0.021  |
| 131 | REWARD   | (c2) | -0.014   | 0.055   | -0.257  | 0.797   | -0.010 | -0.010  |
| 132 | UE       | (b)  | 0.352    | 0.031   | 11.289  | 0.000   | 0.297  | 0.309   |

133

134

135 Mediation Parameters:

| 136 |  |  | Estimate | Std.Err | z-value | P(> z ) | Std.lv | Std.all |
|-----|--|--|----------|---------|---------|---------|--------|---------|
|-----|--|--|----------|---------|---------|---------|--------|---------|

Neseliler et al. Supplementary Information

|     |                    |        |       |        |       |        |        |
|-----|--------------------|--------|-------|--------|-------|--------|--------|
| 137 | STRESS to BMI (a1) | -0.085 | 0.055 | -1.555 | 0.120 | -0.059 | -0.061 |
| 138 | REWARD to BMI (a2) | -0.014 | 0.055 | -0.257 | 0.797 | -0.010 | -0.010 |
| 139 | STRESS via UE (c1) | 0.185  | 0.025 | 7.449  | 0.000 | 0.128  | 0.133  |
| 140 | REWARD via UE (c2) | 0.136  | 0.024 | 5.599  | 0.000 | 0.091  | 0.095  |
| 141 | total effect       | 0.221  | 0.093 | 2.387  | 0.017 | 0.151  | 0.157  |
| 142 | mediation effect   | 0.763  | 0.026 | 29.443 | 0.000 | 0.762  | 0.762  |

143

144

145

146

147

148

149

150

151

152

153

154 **Watershed model**

155 In order to study the endophenotypes that related to BMI in a watershed model, we needed to  
156 statistically satisfy three major criteria (as explained in 1, 2). 1) Higher statistical dimensionality

Neseliler et al. Supplementary Information

157 between upstream variables compared with downstream variables. The statistical dimensionality  
158 of the covariance pattern between all variables will increase as we move upstream in the model.  
159 The result will be that the upstream effects (i.e. brain or personality traits) cannot be fully  
160 captured by a single summary statistic. We tried to capture our cortical thickness variables as a  
161 single latent factor (not shown), but this model had a poor fit suggesting that upstream brain  
162 variables cannot be reduced to a single dimension. In addition, general impulsivity traits were  
163 only captured using three factors as opposed to one latent factor. Furthermore, the upstream  
164 effects were partially independent: all of the endophenotypes (i.e. STRESS, Lack of Self  
165 Control, REWARD) did better than each individual endophenotype (e.g. STRESS) in predicting  
166 the downstream outcome (i.e. UE). 2) Multiple realisability. According to the watershed model,  
167 there are multiple precursory causes for a complex endophenotype. In other words, a single  
168 behavioural dimension such as UE is likely to have multiple neural determinants. In an SEM  
169 framework, this means the variability in each endophenotype (i.e. STRESS, Lack of Self  
170 Control, REWARD) will make partially independent contributions to variability in UE  
171 endophenotype. 3) Hierarchical dependence. The watershed model should exhibit a hierarchical  
172 dependence. That means statistically there should be no residual, or direct, relationships between  
173 levels. In the present context this implies that the influence of general personality variables on  
174 BMI will be indirect, namely through UE. In the SEM formalization of this hypothesis, any  
175 direct paths between general impulsivity domains and BMI will be a source of model misfit, and  
176 mediation analysis will reveal either partial or no mediation.

177 1. Kievit RA, Davis SW, Griffiths J, Correia MM, Cam-Can, Henson RN (2016): A watershed  
178 model of individual differences in fluid intelligence. *Neuropsychologia*. 91: 186–198.

179 2. Kievit RA, Davis SW, Mitchell DJ, Taylor JR, Duncan J, Tyler LK, *et al.* (2014): Distinct



Neseliler et al. Supplementary Information

180 aspects of frontal lobe structure mediate age-related differences in fluid intelligence and  
181 multitasking. *Nat Commun.* 5: 5658.

182

183
